# Supplementary material
Source: PubMed Central journal article supplement (PMC5521856)
Supplement: DB161147SupplementaryData.pdf [file DB161147SupplementaryData.pdf]

SUPPLEMENTARY DATA

**Supplementary Figure S1.**

(A) Representative images of the livers after hematoxylin-eosin staining. Full arrow: lobular inflammation; dashed arrow: portal inflammation.

(B) Hepatic levels of IL-6 and TNF- $\alpha$  cytokines.

(C) Composition of hepatic fatty acids was detected by 1H MRS *in vivo*. SFA: saturated fatty acids; MUFA: monounsaturated fatty acids; PUFA: polyunsaturated fatty acids.

All data are presented as mean  $\pm$  SEM; n=5-6 per group (B) and n=7-9 per group (C). \*p<0.05, \*\*p < 0.01; 2-way ANOVA with Bonferroni correction.

**A**

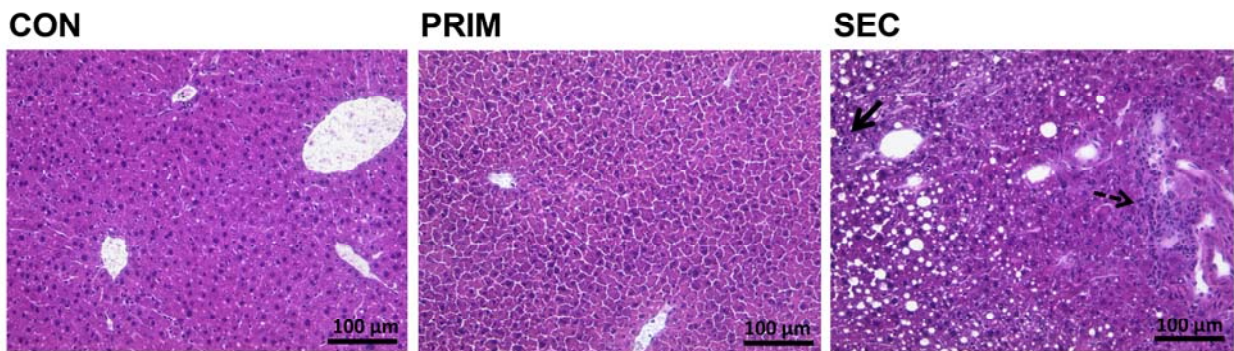

**B**

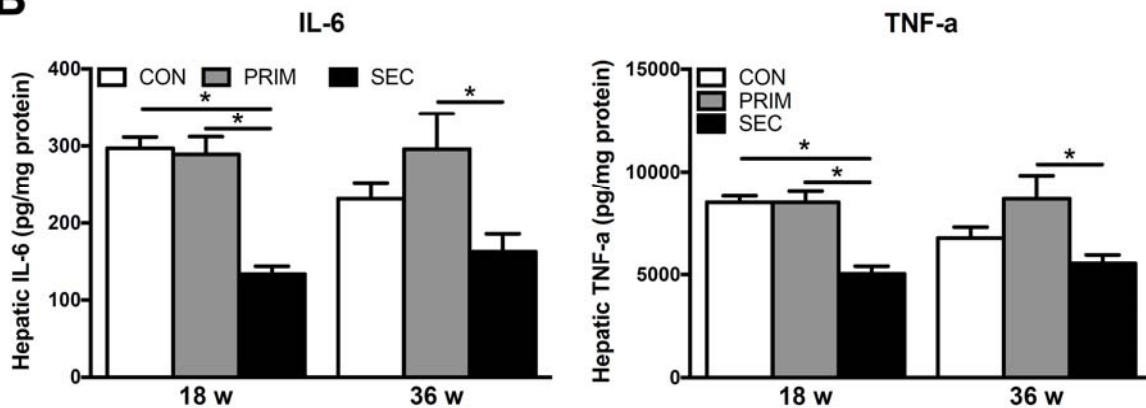

**C**

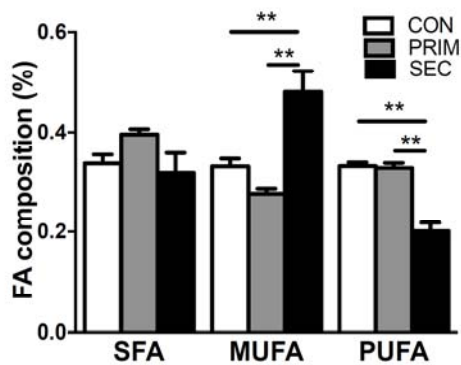

SUPPLEMENTARY DATA

**Supplementary Figure S2. *Ex vivo* insulin sensitivity in 18 w old mice.**

(A,B) Blood glucose (A) and plasma insulin (B) levels in fed state.

(C,D) Cytosolic-to-membrane translocation of Akt in the liver (A) and GLUT4 in the gastrocnemius muscle (B) of 18 w old mice. Tissues were collected 10 min after saline or insulin (1 U/kg) intraperitoneal injection under 6 h fasted conditions (n=6-8 per group).

(C) Insulin suppression of non-esterified fatty acids (NEFA) in the plasma of 36 w old mice from blood collected before the start of the clamp (6 h fasting) and at the end of the clamp (hyperinsulinemia-euglycemia) (n=5-8 per group).

All data are presented as mean ± SEM. \*p < 0.05, \*\*p < 0.01; 2-way ANOVA with Bonferroni correction.

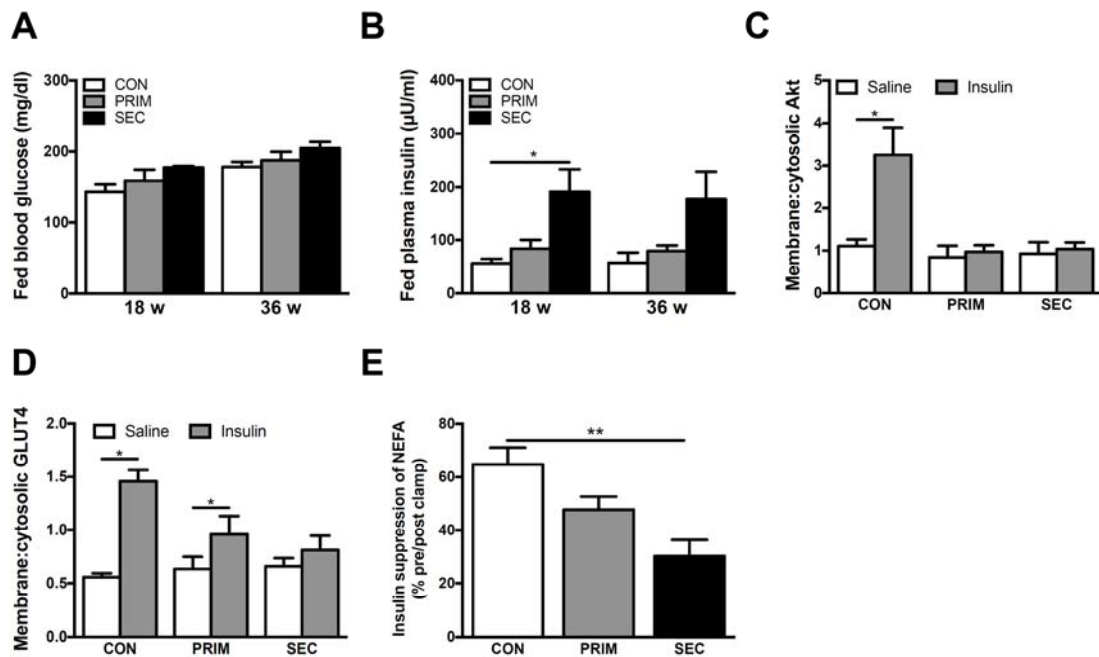

SUPPLEMENTARY DATA

**Supplementary Figure S3. Related to Figure 3.**

**Lipidomic analysis in the liver (A-C) and muscle (D-F) of 6 h fasted mice.**

Total cytosolic (A,D) and membrane (B,E) diacylglycerols and total ceramides (C,F).

All data are presented as mean ± SEM (n=6-7 per group). \*p < 0.05, \*\*p < 0.01, \*\*\*p < 0.001; 2-way ANOVA with Bonferroni correction.

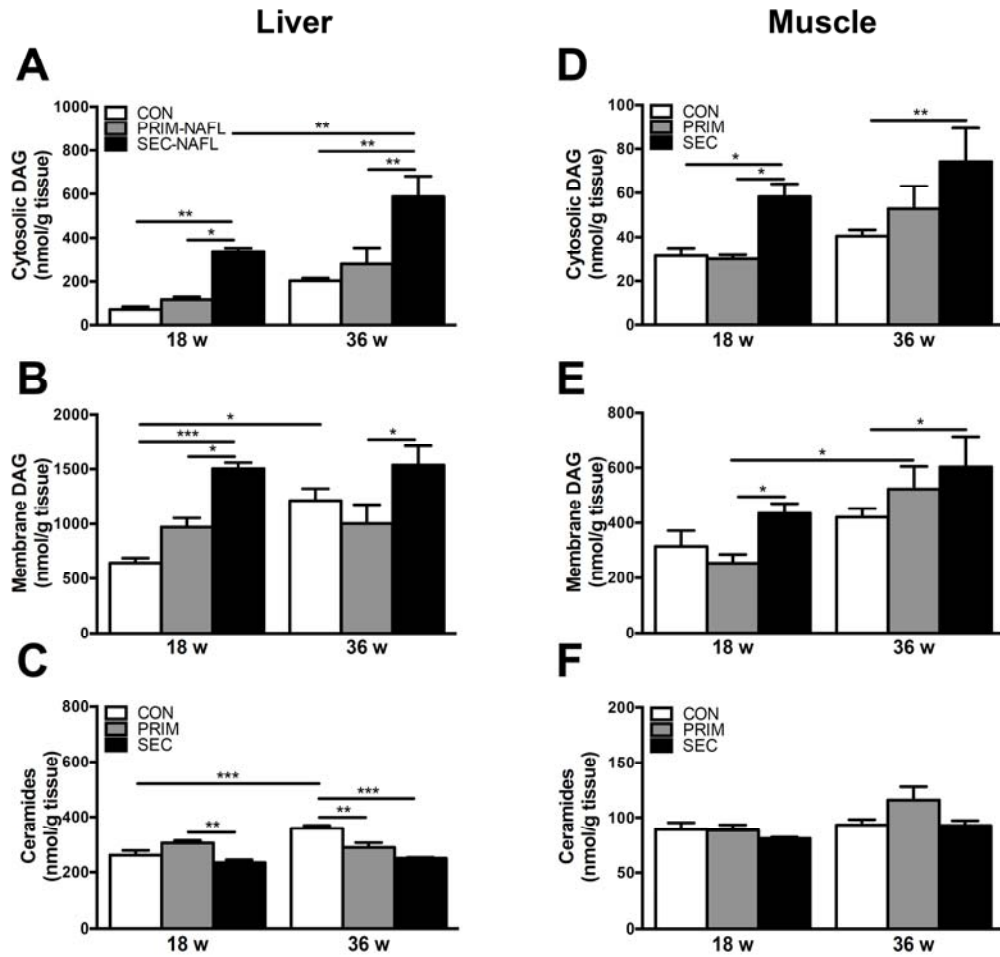

SUPPLEMENTARY DATA

**Supplementary Figure S4. Related to Figure 3.**

**Fatty acid composition of membrane diacylglycerols in the liver (A,B) and muscle (C,D) of 6 h fasted mice.**

Membrane diacylglycerols of 18 w (A,C) and 36 w (B,D) old mice.

All data are presented as mean ± SEM (n=6-7 per group). \*p < 0.05, \*\*p < 0.01, \*\*\*p < 0.001; 2-way ANOVA with Bonferroni correction.

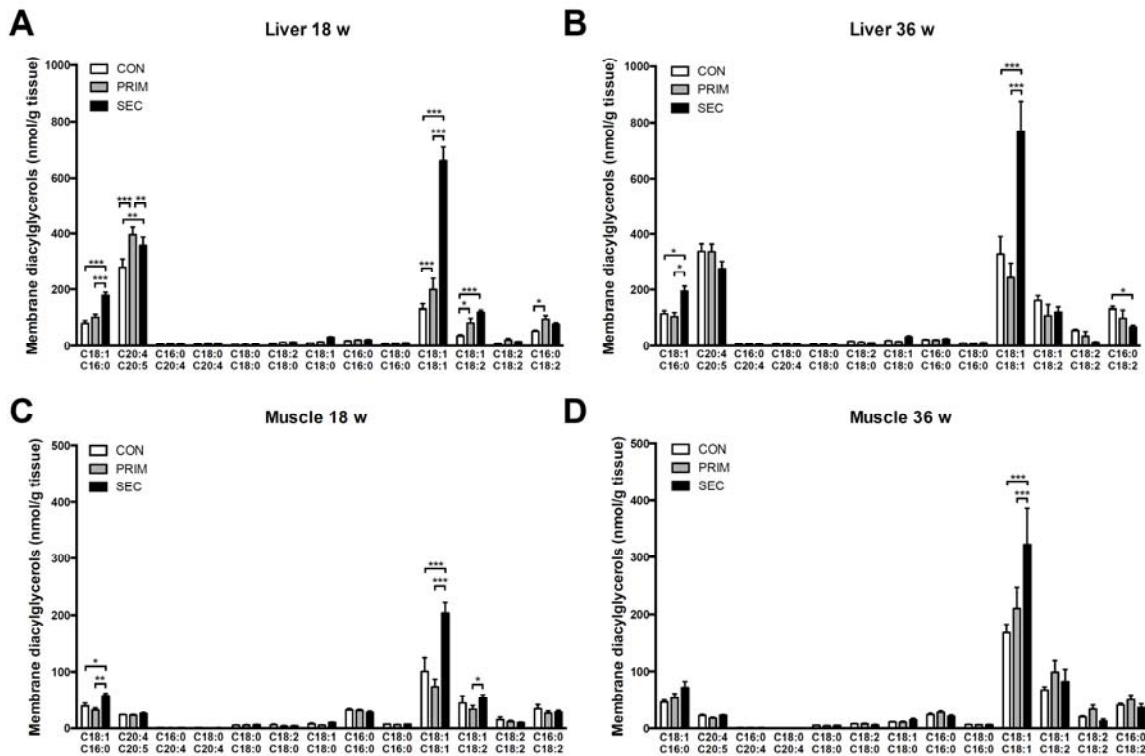

SUPPLEMENTARY DATA

**Supplementary Figure S5. Related to Figure 5.**

**Hepatic lipid peroxidation.**

Hepatic thiobarbituric acid reactive substances (TBARS) were used as marker of lipid peroxidation and normalized per protein content.

All data are presented as mean  $\pm$  SEM (n=6-7 per group). \*p < 0.05; 2-way ANOVA with Bonferroni correction.

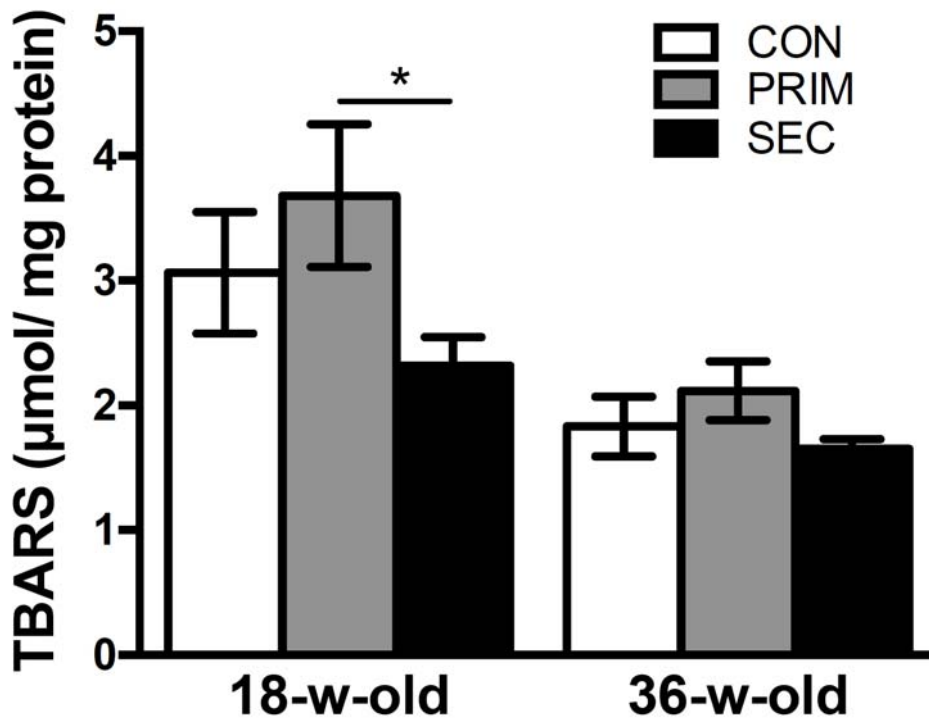

SUPPLEMENTARY DATA

**Supplementary Figure S6.**  
**The levels of hepatic cytokines.**

All data are presented as mean  $\pm$  SEM (n=5-6 per group). 2-way ANOVA with Bonferroni correction.

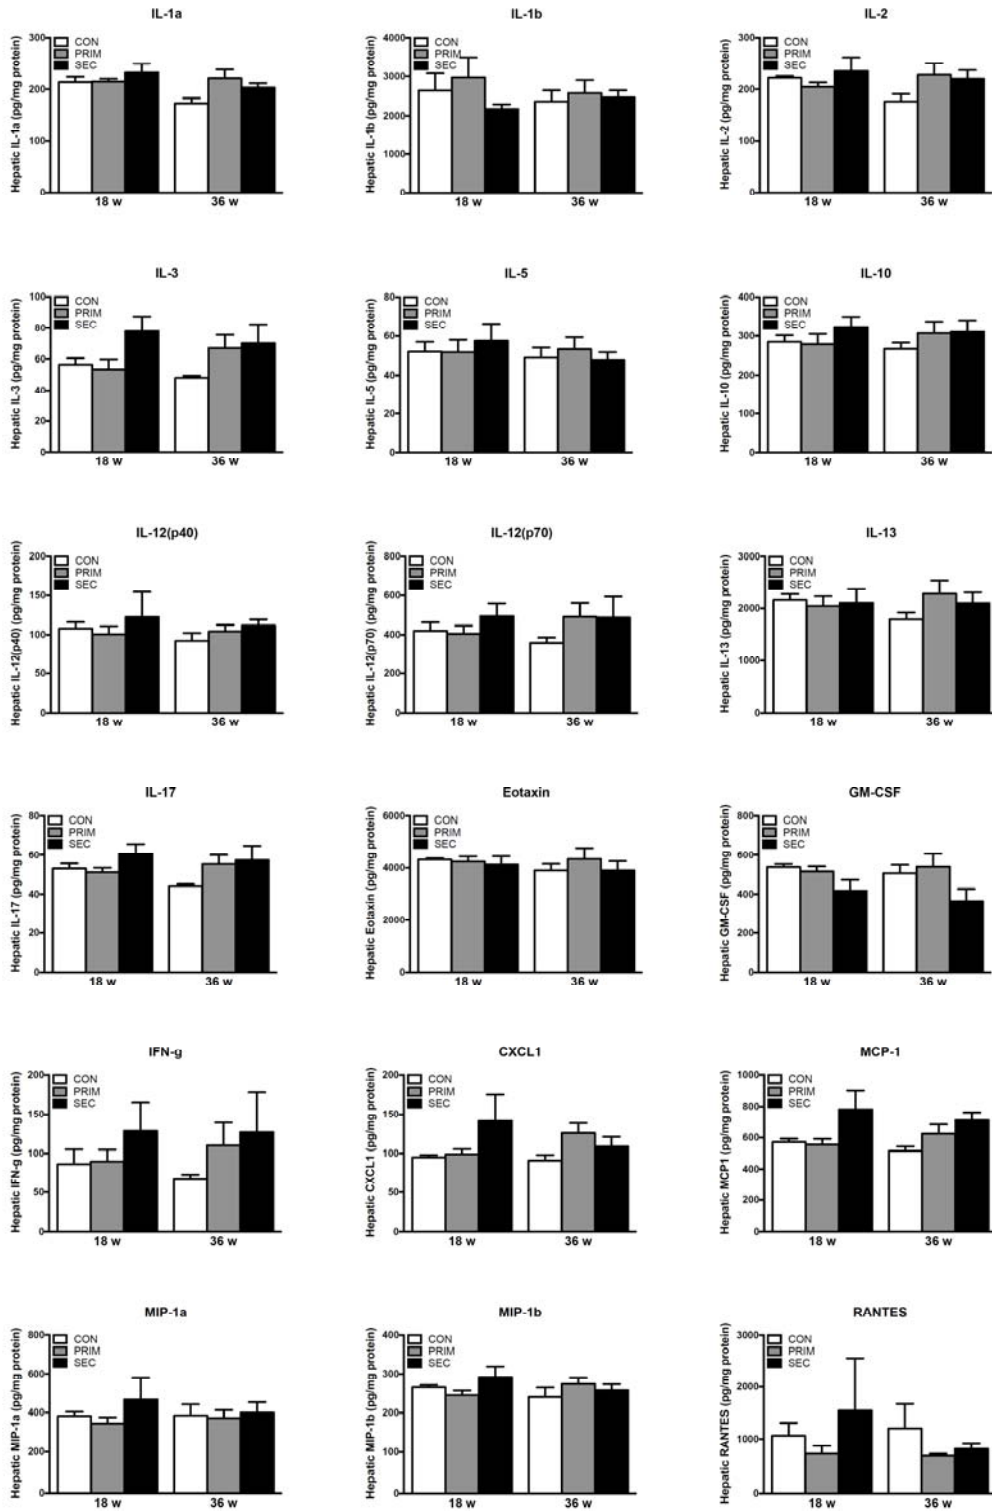

## SUPPLEMENTARY DATA

### **Supplementary Figure S7.**

#### **The levels of circulating cytokines.**

All data are presented as mean  $\pm$  SEM (n=5-6 per group). 2-way ANOVA with Bonferroni correction.

SUPPLEMENTARY DATA

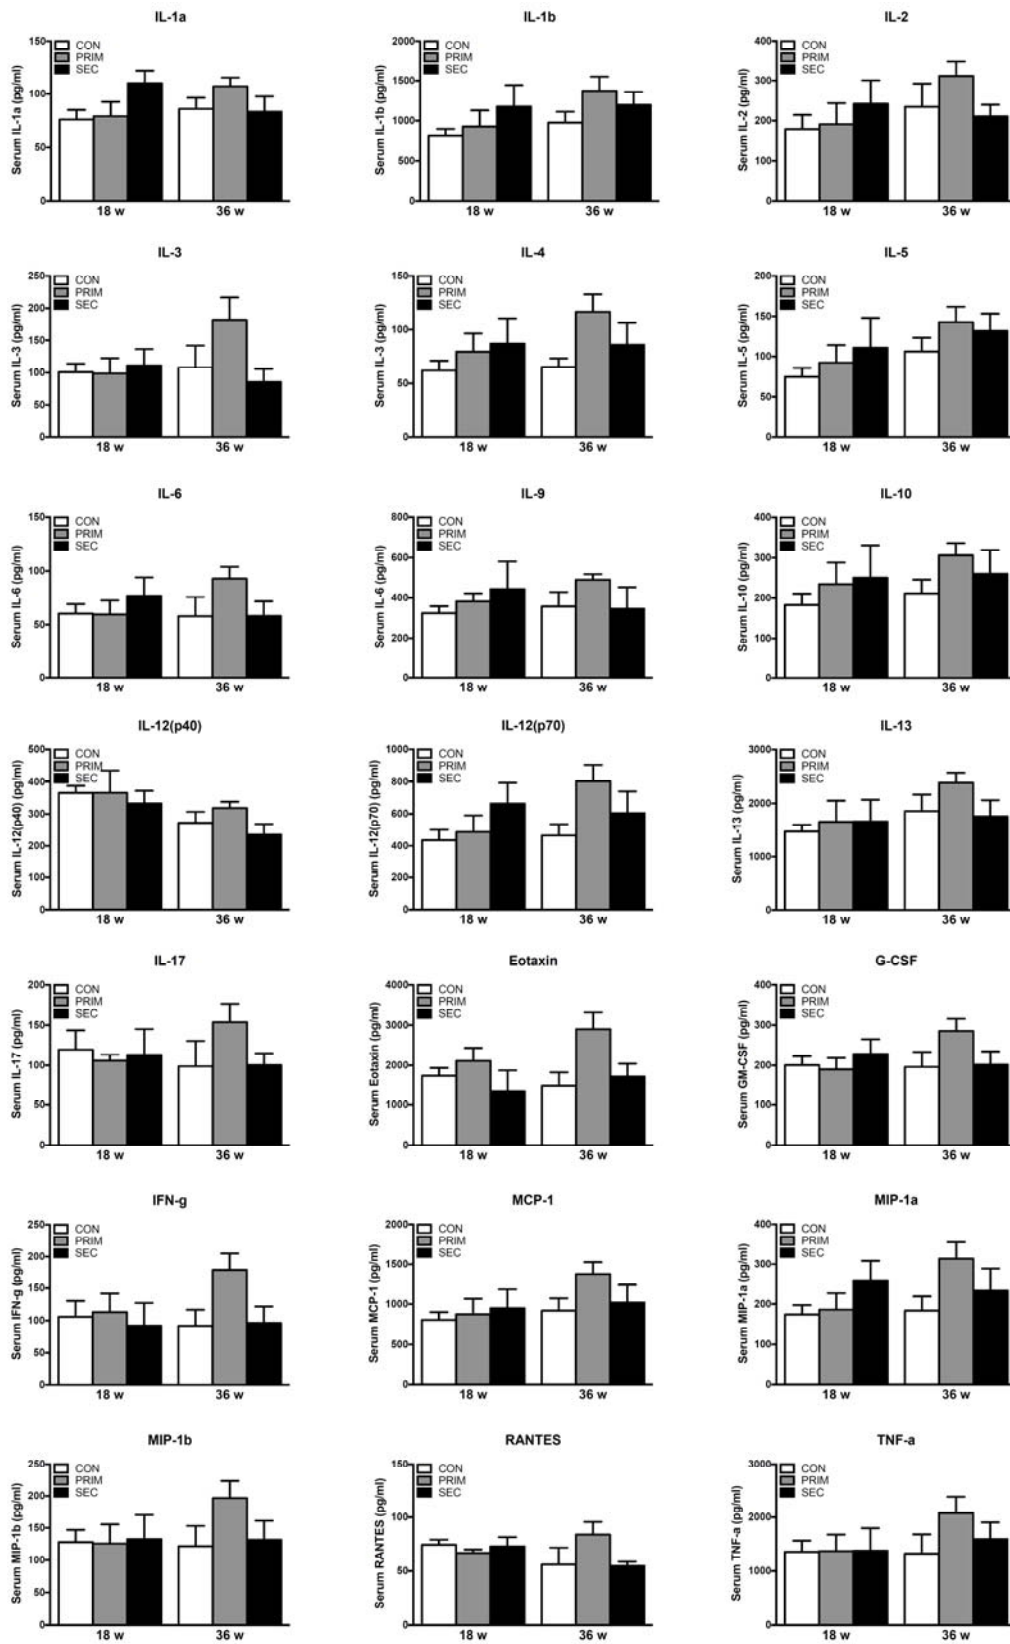



SUPPLEMENTARY DATA

**Supplementary Table S1, related to Figure**  
**Energy balance of CON, PRIM and SEC mice at the age of 18 w and 36 w**

|                                   |       | 18 w       |            |            | 36 w       |            |            |
|-----------------------------------|-------|------------|------------|------------|------------|------------|------------|
|                                   |       | CON        | PRIM       | SEC        | CON        | PRIM       | SEC        |
| Females (n)                       |       | 8          | 9          | 6          | 10         | 7          | 7          |
| Energy expenditure<br>(kcal/h/kg) | Light | 15.9 ± 0.5 | 14.3 ± 0.5 | 14.7 ± 0.5 | 15.5 ± 0.6 | 14.3 ± 0.5 | 14.1 ± 0.5 |
|                                   | Dark  | 19.8 ± 0.6 | 18 ± 0.9   | 18.6 ± 0.9 | 19.2 ± 0.7 | 17.8 ± 0.7 | 18.1 ± 0.8 |
| Food intake<br>(g/kg BW)          | Light | 36 ± 4     | 42 ± 4     | 58 ± 8     | 47 ± 6     | 46 ± 5     | 42 ± 5     |
|                                   | Dark  | 90 ± 8     | 91 ± 5     | 98 ± 11    | 105 ± 12   | 94 ± 6     | 95 ± 6     |
| Water intake<br>(ml/kg BW)        | Light | 36 ± 5     | 55 ± 4     | 76 ± 14*   | 49 ± 5     | 51 ± 3     | 38 ± 8     |
|                                   | Dark  | 97 ± 7     | 108 ± 10   | 126 ± 16   | 105 ± 4    | 110 ± 11   | 108 ± 7    |
| Activity<br>(Counts)              | Light | 322 ± 33   | 450 ± 44   | 364 ± 36   | 337 ± 22   | 351 ± 27   | 235 ± 23   |
|                                   | Dark  | 915 ± 55   | 1197 ± 93  | 895 ± 36‡  | 1320 ± 96  | 1007 ± 91# | 656 ± 89#‡ |

Data are presented as means ± SEM. *P* values were calculated by repeated measures two-way ANOVA with Bonferroni post hoc analysis. \**P*<0.05 and #*P*<0.01 vs. CON at respective age and condition. ‡*P*<0.01 vs. PRIM at respective age and condition.
